# Supplementary material
Source: PubMed Central journal article supplement (PMC4207538)
Supplement: jm500964c_si_001.pdf [file jm500964c_si_001.pdf]

24-jun-2014

**Tumor Xenograft Uptake of a Py-Im Polyamide  
Varies as a Function of Cell Line Grafted: a C-14  
Study**

*SUPPORTING INFORMATION*

Jevgenij A. Raskatov,<sup>†</sup> Jerzy O. Szablowski<sup>†</sup> and Peter B. Dervan<sup>†,\*</sup>

**Double flank experiment**

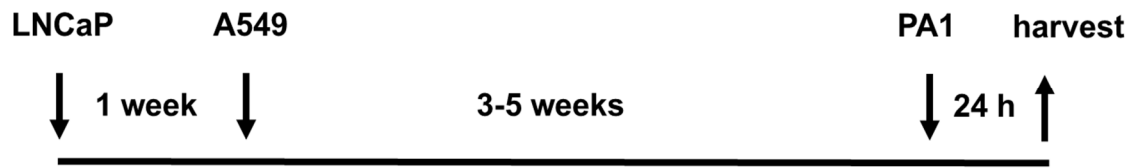

**Single flank experiments**

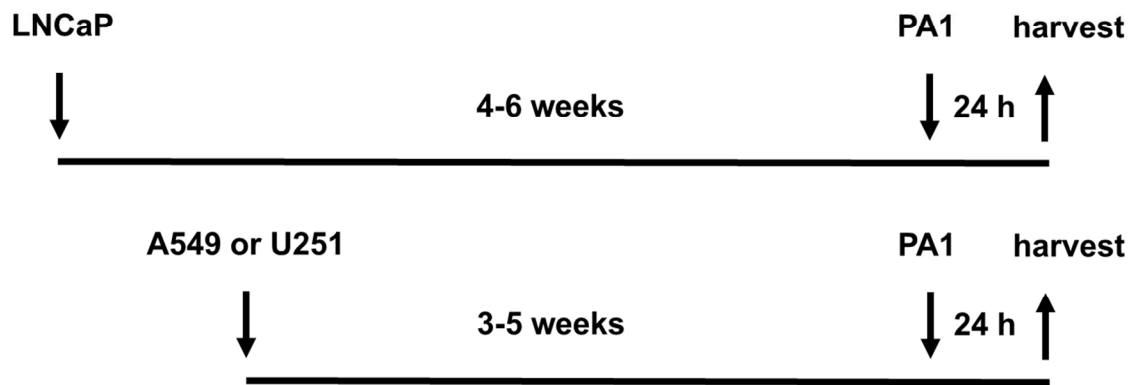

**Figure SI 1.** Engraftment and polyamide administration schedules for the double flank experiment and the single flank versions.

LNCaP

A549

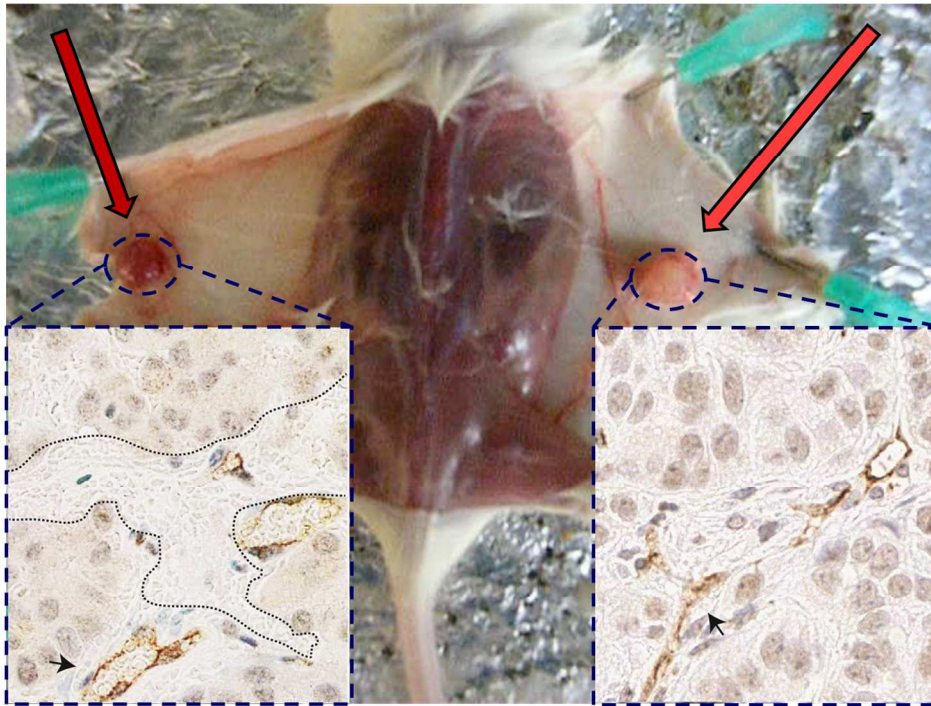

**Figure SI 2.** A representative NSG male mouse that was grafted with LNCaP ( $2.5 \times 10^6$  in 1:1 media / matrigel) and A549 ( $2.5 \times 10^6$  in media), following schedule outlined in (A). Representative histological slices (CD31 stain) are displayed in the inset graphics. LNCaP tumor displays poorly defined vascular spaces with extravasated red blood cells (indicated with the dotted line), absent with A549. Arrows highlight some blood vessels.

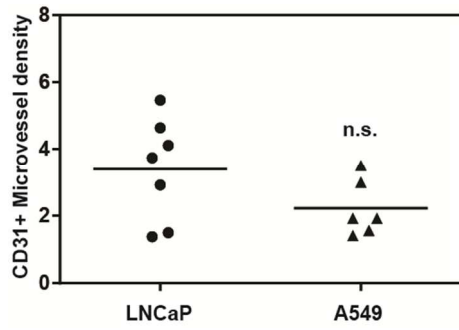

**Figure SI 3.** Microvessel density quantitated for LNCaP and A549 tumor sections, respectively.

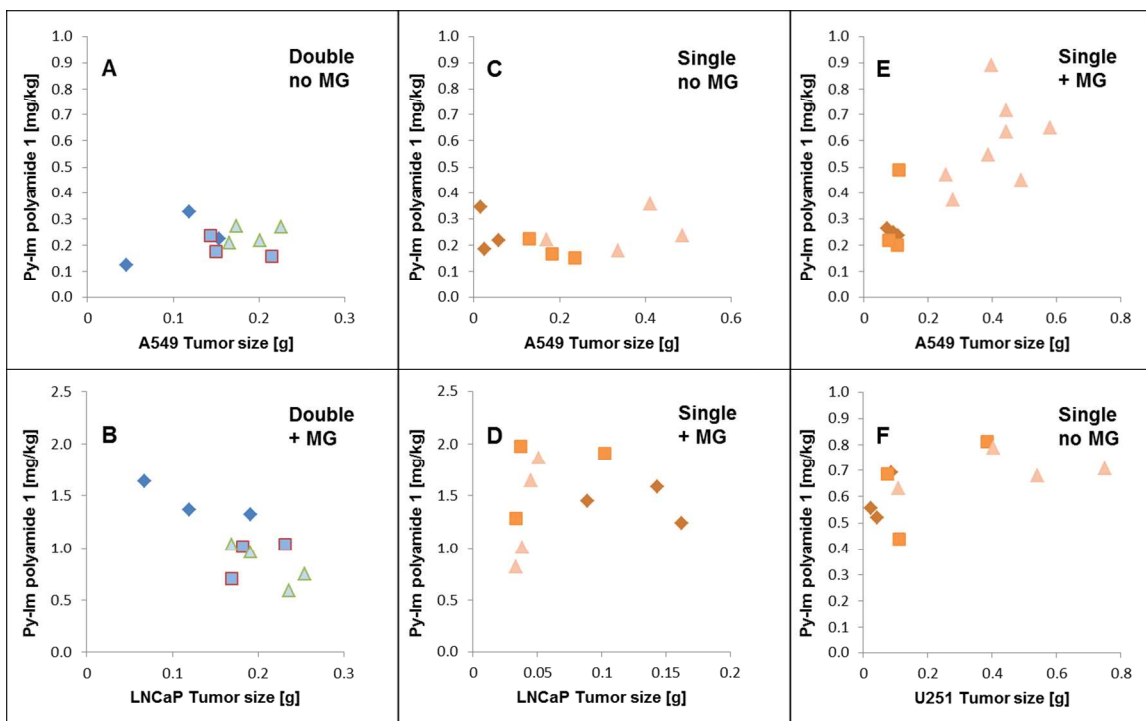

**Figure SI 4.** Tumor concentration of Py-Im polyamide **1** as a function of size. MG denotes matrigel; double / single indicates whether the animals was grafted twice or once, respectively (only relevant with A549 and LNCaP). Post-enugraftment time is coded by diamonds (4 weeks with LNCaP, 3 weeks with A549 or U251), squares (5 weeks with LNCaP, 4 weeks with A549 or U251) and triangles (6 weeks with LNCaP, 5 weeks with A549 or U251).
